# Supplementary material for: A Novel Biocontainment Strategy Makes Bacterial Growth and Survival Dependent on Phosphite
Source: PubMed Central journal article supplement (PMC5357788; doi:10.1038/srep44748), 2017-03-20
Supplement: srep44748-s1.pdf [file srep44748-s1.pdf]

1  
2  
3  
4  
5  
6  
7  
8  
9  
10  
11  
12  
13  
14  
15

**Supplementary information**

**A Novel Biocontainment Strategy Makes Bacterial Growth and Survival  
Dependent on Phosphite**

Ryuichi HIROTA, Kenji ABE, Zen-ichiro KATSUURA, Reiji NOGUCHI, Shigeaki  
MORIBE, Kei MOTOMURA, Takenori ISHIDA, Maxym ALEXANDROV, Hisakage  
FUNABASHI, Takeshi IKEDA, Akio KURODA

Table of Contents

- Supplementary Table 1. Bacterial strains used in this study.
- Supplementary Table 2. Primers and plasmids used in this study.
- Supplementary Figure 1. Choices of the expression system for PtxD and HtxABCDE.

**Supplementary Table 1. Bacterial strains used in this study**

| Strain         | Description                                                                                                                                                                                                           | Reference or source |
|----------------|-----------------------------------------------------------------------------------------------------------------------------------------------------------------------------------------------------------------------|---------------------|
| <i>E. coli</i> |                                                                                                                                                                                                                       |                     |
| DH5α           | Cloning host strain                                                                                                                                                                                                   | Toyobo Co. Ltd.     |
| MG1655         | Wild-type strain; F <sup>-</sup> <i>arcA-1655 fnr-1655</i>                                                                                                                                                            | Laboratory stock    |
| BW25113        | <i>rrnB3 ΔlacZ4787 hsdR514 Δ(araBAD)567 Δ(rhaBAD)568 rph-1</i>                                                                                                                                                        | 60                  |
| BW17335        | DE3( <i>lac</i> )X74 <i>Δ(pstSCAB-phoU)560::Km<sup>r</sup></i>                                                                                                                                                        | 62                  |
| JW2234         | BW25113 <i>ΔglpT::Km<sup>r</sup></i>                                                                                                                                                                                  | NBRP                |
| JW3418         | BW25113 <i>ΔugpB::Km<sup>r</sup></i>                                                                                                                                                                                  | NBRP                |
| JW3641         | BW25113 <i>ΔuhpT::Km<sup>r</sup></i>                                                                                                                                                                                  | NBRP                |
| MT2010         | MG1655 <i>ΔpitA::frit ΔpitB::frit ΔphnC::frit ΔphoA::frit</i>                                                                                                                                                         | 28                  |
| MT2012         | MG1655 <i>ΔpitA::frit ΔpitB::frit ΔphnC::frit phoA::frit pstSCABphoU::kan</i>                                                                                                                                         | 28                  |
| MT2012-ptxD    | MT2012 harboring ptxD/pSTV                                                                                                                                                                                            |                     |
| RN1002         | MG1655 <i>ΔpitA::frit ΔpitB::frit ΔphnC::frit phoA::frit ΔglpT::frit</i>                                                                                                                                              | This study          |
| RN1004         | MG1655 <i>ΔpitA::frit ΔpitB::frit ΔphnC::frit phoA::frit ΔglpT::frit ΔugpB::frit</i>                                                                                                                                  | This study          |
| RN1006         | MG1655 <i>ΔpitA::frit ΔpitB::frit ΔphnC::frit phoA::frit ΔglpT::frit ΔugpB::frit ΔuhpT::frit</i>                                                                                                                      | This study          |
| RN1007         | MG1655 <i>ΔpitA::frit ΔpitB::frit ΔphnC::frit phoA::frit ΔglpT::frit ΔugpB::frit ΔuhpT::frit</i><br>Ptac4071-ptxD/pTWV229, htxABCDE/pSTV28                                                                            | This study          |
| RN1008         | MG1655 <i>ΔpitA::frit ΔpitB::frit ΔphnC::frit phoA::frit ΔglpT::frit ΔugpB::frit ΔuhpT::frit</i><br><i>Δ(pstSCAB-phoU)560::Km<sup>r</sup></i> ,<br>Ptac4071-ptxD/pTWV229, htxABCDE/pSTV28,<br>Pt/HPt-dependent strain | This study          |

*Ralstonia* sp. 4506 Pt-oxidizer, harboring *ptxABCD* gene 57

*Pseudomonas stutzeri* WM88 HPt- and Pt-oxidizer, harboring *htxABCE* gene 17

16

17

18

**Supplementary Table 2. Primers and plasmids used in this study**

| Name                       | Sequence (5'-3') or description                           | Source |
|----------------------------|-----------------------------------------------------------|--------|
| <b>Primers<sup>1</sup></b> |                                                           |        |
| EcoPtxA(-186)_fw           | aagaattcTAGCAGGCGTCTATATTTGGCATAG                         | -      |
| BamPtxC(+13)_rv            | aaatctagaGCTTTGGGAGTTATTTGAACTTGCG                        | -      |
| EcoPtxD(-157)_fw           | aagaattcAATCGGGTTCGAGCTGATGGGCTC                          | -      |
| BamPtxD(+24)_rv            | aaatctagaTCGCCACACGCTCCAGATCTATCAC                        | -      |
| htxA-14_fw2                | <u>cggtagccggggatc</u> CTAGGAGCATCACCATGTTTGCAG<br>AGC    | -      |
| htxE_rv2                   | <u>cgactctagaggatc</u> TCAGATCAGCTTGGCGCGGATGCG<br>CGCCTG | -      |
| Ptac4071-fw                | GCCCCGCATAAACTGCCAGGCATC                                  | -      |
| Ptac4071-rv                | GGCAGTCTCCTTGTGTGAAATTGTTATCCG                            | -      |
| ptxD-fw                    | <u>cacaaggagactgcc</u> ATGAAGCCCAAAGTCGTCCTC              | -      |
| ptxD-rv                    | <u>cagtttatggcgggc</u> CGCCGCCTTTACTCCCGGATAC             | -      |
| pitA_chkx1-fw              | CGTTGCGCTCCTCTTAGAAAA                                     | -      |
| pitA_chkx3-rv              | GTGTAACTGATTGGCAGCG                                       | -      |
| pitB_chkx1-fw              | TTAACCAGTGGAATACCTGTG                                     | -      |
| pitB_chkx3-rv              | CTCAGAATATCCGTTCAACC                                      | -      |
| phnC_chkx1-fw              | AACTGTTCCGACGCGATTGC                                      | -      |
| phnC_chkx2-rv              | ATCAACACGCTCCAGTAACC                                      | -      |
| pstSCABphoU_chk-fw         | GACGTCGAAATCGCCTCTGAATTCC                                 | -      |
| pstSCABphoU_chk-rv         | ACTTCAGATGTGTAACCAGTCGCTG                                 | -      |
| phoA_chkx1-fw              | GAGTCGAAAGAACTGTGTGC                                      | -      |
| phoA_chkx2-rv              | GAGGAGTTAAAGGAGGTTCC                                      | -      |

|               |                      |   |
|---------------|----------------------|---|
| glpT_chk-fw   | TCATAAATAAGACCACGGGC | - |
| glpT_chkx3-rv | ACCAGTTTATTCTGCTGAGC | - |
| ugpB_chk-fw   | CGCATTCGGTACAACAAGAG | - |
| ugpB_chkx3-rv | GAAGAACAGGAAGTTGTAGC | - |
| uhpT_chk-fw   | ACAATGCATGCCTCACGCAG | - |
| uhpT_chkx3-rv | CATATGGCAACACCATTGCC | - |

### Plasmids

|                           |                                                                                                                                                                                             |                         |
|---------------------------|---------------------------------------------------------------------------------------------------------------------------------------------------------------------------------------------|-------------------------|
| pMW118                    | Cloning vector; Amp <sup>r</sup> , a pSC101 derivative low-copy<br>-number vector                                                                                                           | Nippon Gene<br>Co. Ltd. |
| ptxABC/pMW118             | PtxABC expression plasmid                                                                                                                                                                   | This study              |
| htxABCDE/pMW118           | HtxABCDE expression plasmid                                                                                                                                                                 | This study              |
| pSTV28                    | Cloning vector; Cm <sup>r</sup> , a pACYC184 derivative<br>medium-copy-number vector                                                                                                        | Takara Bio<br>Inc.      |
| ptxD/pSTV28               | PtxD expression plasmid                                                                                                                                                                     | This study              |
| htxABCDE/pSTV28           | HtxABCDE expression plasmid                                                                                                                                                                 | This study              |
| pTWV229ΔPlac-Ptac<br>4071 | Cloning vector; a pTWV229 derivative<br>medium-copy-number vector containing a <i>tac</i> promoter<br>variant Ptac4071 in the <i>SmaI</i> site of the multi-cloning site                    | 57                      |
| pTWV229ΔPlac-Ptac<br>4073 | Cloning vector; a pTWV229 derivative<br>medium-copy-number vector containing a <i>tac</i> promoter<br>variant Ptac4073 in the <i>SmaI</i> site of the multi-cloning site                    | 57                      |
| Ptac4071-ptxD/pTWV<br>229 | PtxD expression plasmid under the control of Ptac4071<br>promoter. A 15-amino acid sequence extension that<br>increases PtxD activity was added at the C-terminus end<br>of wild-type PtxD. | This study              |
| Ptac4073-ptxD/pTWV<br>229 | PtxD expression plasmid under the control of Ptac4073<br>promoter. A 15-amino acid sequence extension that<br>increases PtxD activity was added at the C-terminus end<br>of wild-type PtxD. | This study              |
| pCP20                     | FLP expression plasmid; Amp <sup>r</sup> , temperature-sensitive<br>replication and FLP synthesis                                                                                           | 61                      |

---

19 <sup>1</sup>Lowercase letters denote additional sequences for restriction enzyme sites. Lowercase underlined letters  
20 denote 15-bp sequences required for recombination by In-Fusion cloning reaction.  
21

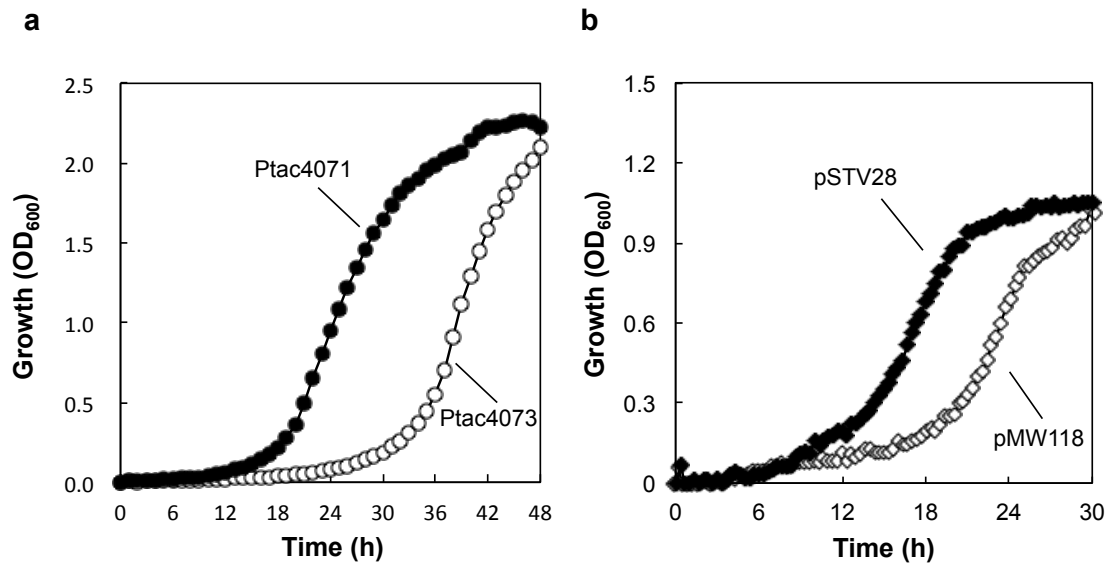

22

23 **Supplementary Fig. 1. Choices of the expression system for PtxD and HtxABCDE.**

24 **a.** The effect of promoter strength on the growth of PtxD-expressing *E. coli* in MOPS-Pt  
 25 medium. *E. coli* MG1655 was transformed with the plasmids Ptac4071-ptxD/pTWV229  
 26 (closed circles) and Ptac4073-ptxD/pTWV229 (open circles), and their growth on  
 27 MOPS-Pt was monitored every ten minutes. *E. coli* expressing PtxD under Ptac4071  
 28 promoter showed higher growth rate than that using Ptac4073. Since the promoter  
 29 strength of Ptac4071 is approximately five times higher than that of Ptac4073, this  
 30 result indicated that increased PtxD expression level could support higher growth rate of  
 31 *E. coli* in MOPS-Pt. **b.** The effect of plasmid copy numbers on the growth of  
 32 HtxABCDE-expressing *E. coli* on MOPS-HPt medium. *E. coli* harboring  
 33 Ptac4071-ptxD/pTWV229 was transformed with the plasmids containing *htxABCDE*  
 34 gene (*htxABCDE*/pSTV28, closed diamonds; *htxABCDE*/pMW118, open diamonds).  
 35 Use of the pSTV expression system resulted in faster growth than that obtained with the  
 36 pMW expression system in MOPS-HPt. We failed to construct an HtxABCDE  
 37 expression plasmid using a high-copy number plasmid pUC119, indicating that high  
 38 expression of HtxABCDE is detrimental to the cell growth.
